# Supplementary material
Source: Springer Nature journal article supplement (https://www.springermedizin.de/resource/supplementary/13046_2010_297_MOESM1_ESM.pdf/9662062)

Inhibition ratio (%)

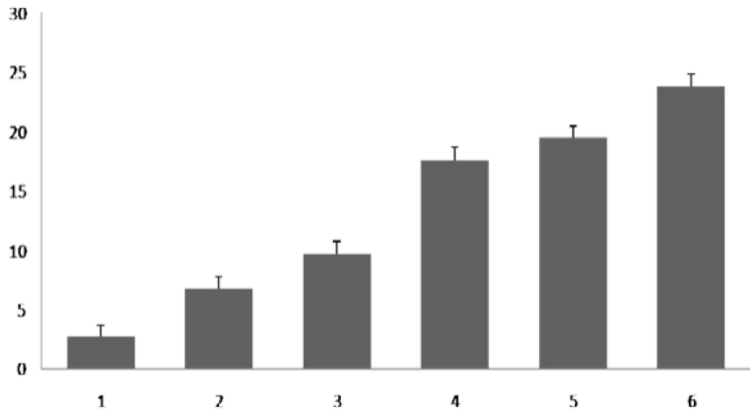

Supplement: MOESM1 [file 9662062]
